# Supplementary material
Source: publisher figshare collection journal article supplement (https://tandf.figshare.com/articles/dataset/_/24076064)
Supplement: Supplementary file 2 [file 1]

Archive with 2 entries (2 files):
- ionc_a_2251670_sm3018.pdf
- ionc_a_2251670_sm3017.docx
