# Supplementary material
Source: publisher figshare collection journal article supplement (https://tandf.figshare.com/articles/dataset/_/24076064)
Supplement: Supplementary file 2 [file 1 › ionc_a_2251670_sm3017.docx]

**Supplementary materials**

Labor market affiliation of patients with myeloproliferative neoplasms:

a population-based matched cohort study

Lise Skovgaard Svingel, Sarah Friis Christensen, Anders Kjærsgaard, Anna Stenling, Björn Paulsson, Christen Lykkegaard Andersen, Christian Fynbo Christiansen, Jesper Stentoft, Jørn Starklint, Marianne Tang Severinsen, Mette Borg Clausen, Morten Hagemann Hilsøe, Hans Carl Hasselbalch, Henrik Frederiksen, Marie Bak, Ellen Margrethe Mikkelsen

Contents

[**Table S1.** Data sources and measurements for patient characteristics 2](#_Toc142992451)

[**Table S2.** Labor market affiliation variables from the DREAM database 3](#_Toc142992452)

[**Table S3.** Additional characteristics of the study population at index date 4](#_Toc142992453)

[**Table S4.** Labor market affiliation in absolute numbers pre- and post-diagnosis (cross-sectional), stratified by diagnosis group 5](#_Toc142992454)

[**Table S5.** Labor market affiliation in absolute numbers at index week (cross-sectional), stratified by diagnosis group 10](#_Toc142992455)

[**Table S6.** Labor market affiliation as proportion of person-time in weeks, summarized over each year and category of labor market affiliation and stratified by diagnosis group 11](#_Toc142992456)

[**Figure S1.** Timeline illustrating dates for indexing, the pre-diagnosis period, and the post-diagnosis follow-up period 14](#_Toc142992457)

[**Figure S2.** Labor market affiliation of individuals younger than 70 years as proportions by week for each diagnosis group from two years before until two years after diagnosis 15](#_Toc142992458)

### **Table S1.** Data sources and measurements for patient characteristics

| **Patient characteristics** | **Data source** | **Description** |
| --- | --- | --- |
| First-time MPN diagnosis | DCMR | Diagnosis according to WHO 2008/WHO 2016/ICD-10:   - ET - PV - MF - MPN-U |
| Date of first-time MPN diagnosis | DCMR | Diagnostic sampling date |
| Age | CRS | Years of age |
| Sex | CRS | - Male - Female |
| Region of residence | CRS | - Capital Region of Denmark - Region Zealand - Region of Southern Denmark - North Denmark Region - Central Denmark Region |
| Level of education | Statistics Denmark | Highest completed education, classified as:   - Short: primary and lower secondary school, general and vocational upper secondary education, and higher technical and commercial examination programs - Medium: short- and medium-cycle higher education) - Long: Bachelor's degree, long-cycle higher education, and research education - Missing: including no education |
| Charlson Comorbidity Index score | DNPR | Score based on the 19 conditions (excluding non-melanoma skin cancer [ICD-10: C44]), classified as score 0, 1, and >1. |
| Death | CRS | Date |
| Emigration | CRS | Date |

*Abbreviations:* CRS: Danish Civil Registration System; DCMR: Danish National Chronic Myeloid Neoplasia Registry; DNPR: Danish National Patient Registry; ET: essential thrombocythemia; ICD-10: International Classification of Diseases, 10th revision; MF: myelofibrosis; MPN-U: unclassifiable myeloproliferative neoplasm; PV: polycythemia vera; WHO: World Health Organization.

### **Table S2.** Labor market affiliation variables from the DREAM database

| **Category** | **Derivation** | **Description** | **Code** |
| --- | --- | --- | --- |
| Working | Indirect | Age ≤65 years in 1994 or any age after 1994 and no transfer payment (except State Educational Grant and parental leave pay). | - |
| Direct | State Educational Grant and parental leave pay. | 511, 521-522, 651-652, 661, 881 |
| Unemployed | Direct | Labor market-related benefits including unemployment benefit and cash benefit. | 111, 115, 121, 130-139, 140-149, 151-153, 160-169, 213-219, 231, 299, 412-413, 700-748 |
| Retirement pension | Indirect | Age >65 years in 1994 and no transfer payment. | - |
| Direct | Transfer payment including voluntary early retirement scheme and public retirement pension (codes incomplete from 1994-2007). | 611, 621-622, 998 |
| Disability pension | Direct | Disability pension | 783 |
| Sickness benefit | Direct | Sickness benefit | 890-899 |
| Other health-related benefits | Direct | Health-related benefits including wage-subsidized employment, sheltered job, and resource-building program. | 750-758, 760-768, 771, 774, 781, 810, 813-818, 870, 873-878 |
| Dead | Direct | Dead | 999 |

### **Table S3.** Additional characteristics of the study population at index date

|  | **ET** | **nonET** | **PV** | **nonPV** | **MF** | **nonMF** | **MPN-U** | **nonMPN-U** |
| --- | --- | --- | --- | --- | --- | --- | --- | --- |
| **Total number, n** | 1,140 | 11,181 | 1,109 | 10,873 | 533 | 5,217 | 560 | 5,466 |
| **Year of diagnosis, n (%)** |  |  |  |  |  |  |  |  |
| 2010 | 129 (11.3) | 1,229 (11.0) | 128 (11.5) | 1,208 (11.1) | 64 (12.0) | 629 (12.1) | 72 (12.9) | 707 (12.9) |
| 2011 | 130 (11.4) | 1,298 (11.6) | 129 (11.6) | 1,301 (12.0) | 73 (13.7) | 723 (13.9) | 77 (13.8) | 750 (13.7) |
| 2012 | 158 (13.9) | 1,560 (14.0) | 146 (13.2) | 1,425 (13.1) | 82 (15.4) | 818 (15.7) | 75 (13.4) | 730 (13.4) |
| 2013 | 171 (15.0) | 1,671 (14.9) | 155 (14.0) | 1,549 (14.2) | 97 (18.2) | 952 (18.2) | 73 (13.0) | 714 (13.1) |
| 2014 | 169 (14.8) | 1,664 (14.9) | 204 (18.4) | 1,994 (18.3) | 66 (12.4) | 610 (11.7) | 84 (15.0) | 824 (15.1) |
| 2015 | 191 (16.8) | 1,878 (16.8) | 178 (16.1) | 1,725 (15.9) | 79 (14.8) | 788 (15.1) | 85 (15.2) | 832 (15.2) |
| 2016 | 192 (16.8) | 1,881 (16.8) | 169 (15.2) | 1,671 (15.4) | 72 (13.5) | 697 (13.4) | 94 (16.8) | 909 (16.6) |
| **Region of residence, n (%)** |  |  |  |  |  |  |  |  |
| Capital Region of Denmark | 418 (36.7) | 4,129 (36.9) | 310 (28.0) | 3,025 (27.8) | 185 (34.7) | 1,823 (34.9) | 107 (19.1) | 1,032 (18.9) |
| Region Zealand | 164 (14.4) | 1,594 (14.3) | 199 (17.9) | 1,948 (17.9) | 150 (28.1) | 1,475 (28.3) | 82 (14.6) | 806 (14.7) |
| Region of Southern Denmark | 229 (20.1) | 2,235 (20.0) | 281 (25.3) | 2,712 (24.9) | 106 (19.9) | 1,031 (19.8) | 121 (21.6) | 1,186 (21.7) |
| North Denmark Region | 49 (4.3) | 481 (4.3) | 93 (8.4) | 926 (8.5) | 43 (8.1) | 416 (8.0) | 141 (25.2) | 1,364 (25.0) |
| Central Denmark Region | 280 (24.6) | 2,742 (24.5) | 226 (20.4) | 2,262 (20.8) | 49 (9.2) | 472 (9.0) | 109 (19.5) | 1,078 (19.7) |

*Abbreviations:* ET: essential thrombocythemia; MF: myelofibrosis; MPN-U: unclassifiable myeloproliferative neoplasm; PV: polycythemia vera

### **Table S4.** Labor market affiliation in absolute numbers pre- and post-diagnosis (cross-sectional), stratified by diagnosis group

|  | | **Week relative to index** | | | |
| --- | --- | --- | --- | --- | --- |
|  |  | **-104** | **-52** | **52** | **104** |
| **Cohort** | **Labor market affiliation, n** |  |  |  |  |
| ET | Working | 471 | 448 | 380 | 355 |
| Unemployed | 30 | 24 | 22 | 27 |
| Retirement pension | 545 | 571 | 607 | 596 |
| Disability pension | 61 | 59 | 57 | 60 |
| Sickness benefit and other health-related benefits | 33 | 38 | 59 | 53 |
| Died | - | - | 15 | 42 |
| Emigrated | - | - | 0 | 7 |
| nonET | Working | 4,590 | 4,343 | 3,971 | 3,835 |
| Unemployed | 342 | 345 | 291 | 235 |
| Retirement pension | 5,442 | 5,709 | 6,000 | 5,961 |
| Disability pension | 549 | 494 | 420 | 388 |
| Sickness benefit and other health-related benefits | 258 | 290 | 269 | 263 |
| Died | - | - | 220 | 419 |
| Emigrated | - | - | 10 | 80 |
| PV | Working | 344 | 321 | 252 | 238 |
| Unemployed | 47 | 42 | 38 | 35 |
| Retirement pension | 635 | 661 | 707 | ≤ 708a |
| Disability pension | 56 | 57 | 54 | 50 |
| Sickness benefit and other health-related benefits | 27 | 28 | 45 | 42 |
| Died | - | - | 13 | 35 |
| Emigrated | - | - | 0 | ≤ 5a |
| nonPV | Working | 3,734 | 3,535 | 3,126 | 2,925 |
| Unemployed | 290 | 256 | 204 | 197 |
| Retirement pension | 6,086 | 6,324 | 6,625 | 6,639 |
| Disability pension | 541 | 532 | 458 | 424 |
| Sickness benefit and other health-related benefits | 222 | 226 | 211 | 180 |
| Died | - | - | 243 | 454 |
| Emigrated | - | - | 6 | 54 |
| MF | Working | 150 | 140 | 107 | 107 |
| Unemployed | ≤ 5a | 8 | ≤ 5a | ≤ 5a |
| Retirement pension | 344 | ≤ 358a | ≤ 327a | 284 |
| Disability pension | 29 | 26 | 20 | 18 |
| Sickness benefit and other health-related benefits | ≤ 5a | ≤ 5a | 21 | 11 |
| Died | - | - | 57 | 105 |
| Emigrated | - | - | 0 | ≤ 5a |
| nonMF | Working | 1,379 | 1,301 | 1,160 | 1,075 |
| Unemployed | 102 | 90 | 72 | 64 |
| Retirement pension | 3,462 | 3,574 | ≤ 3,643a | 3,562 |
| Disability pension | 202 | 176 | 136 | 111 |
| Sickness benefit and other health-related benefits | 72 | 76 | 66 | 62 |
| Died | - | - | 139 | 285 |
| Emigrated | - | - | ≤ 5a | 58 |
| MPN-U | Working | 158 | 144 | 111 | 113 |
| Unemployed | 13 | 17 | 17 | 10 |
| Retirement pension | 346 | 357 | 344 | ≤ 326a |
| Disability pension | 29 | 30 | 25 | 21 |
| Sickness benefit and other health-related benefits | 14 | 12 | 20 | 14 |
| Died | - | - | 43 | 75 |
| Emigrated | - | - | 0 | ≤ 5a |
| nonMPN-U | Working | 1,747 | 1,604 | 1,433 | 1,344 |
| Unemployed | 97 | 109 | 82 | 72 |
| Retirement pension | 3,303 | 3,420 | ≤ 3,545a | 3,520 |
| Disability pension | 214 | 213 | 180 | 159 |
| Sickness benefit and other health-related benefits | 105 | 120 | 98 | 97 |
| Died | - | - | 127 | 254 |
| Emigrated | - | - | ≤ 5a | 20 |

*Exact cell counts below or equal to five were masked as ≤5 and related cell counts were rounded to prevent identification of individuals by cross-tabulation.

*Abbreviations:* ET: essential thrombocythemia; MF: myelofibrosis; MPN-U: unclassifiable myeloproliferative neoplasm; PV: polycythemia vera

### **Table S5.** Labor market affiliation in absolute numbers at index week (cross-sectional), stratified by diagnosis group

|  | **ET** | **nonET** | **PV** | **nonPV** | **MF** | **nonMF** | **MPN-U** | **nonMPN-U** |
| --- | --- | --- | --- | --- | --- | --- | --- | --- |
| **Total number, n** | 1,140 | 11,181 | 1,109 | 10,873 | 533 | 5,217 | 560 | 5,466 |
| **Labor market affiliation, n** |  |  |  |  |  |  |  |  |
| Working | 402 | 4,156 | 250 | 3,331 | 122 | 1,229 | 121 | 1,519 |
| Unemployed | 26 | 305 | 36 | 260 | ≤ 5a | 75 | 13 | 89 |
| Retirement pension | 594 | 5,959 | 691 | 6,566 | 367 | 3,676 | 374 | 3,550 |
| Disability pension | 58 | 460 | 54 | 516 | 22 | 161 | 26 | 200 |
| Sickness benefit | 41 | 157 | 61 | 94 | 17 | 34 | 19 | 59 |
| Other health-related benefits | 19 | 144 | 17 | 106 | ≤ 5a | 42 | 7 | 49 |

a Exact cell counts below or equal to five were masked as ≤5 to prevent identification of individuals by cross-tabulation.

*Abbreviations:* ET: essential thrombocythemia; MF: myelofibrosis; MPN-U: unclassifiable myeloproliferative neoplasm; PV: polycythemia vera

### **Table S6.** Labor market affiliation as proportion of person-time in weeks, summarized over each year and category of labor market affiliation and stratified by diagnosis group

|  | | **Year relative to index** | | | | | | | | | | |
| --- | --- | --- | --- | --- | --- | --- | --- | --- | --- | --- | --- | --- |
| **Cohort** | **Labor market affiliation, %** | **-2** | **-1** | **1** | **2** | **3** | **4** | **5** | **6** | **7** | **8** | **9** |
| **ET** |  |  |  |  |  |  |  |  |  |  |  |  |
|  | Working | 40.4 | 37.7 | 34.0 | 32.8 | 28.8 | 23.1 | 16.9 | 12.4 | 7.3 | 4.0 | 1.5 |
|  | Unemployed | 2.5 | 2.6 | 2.0 | 2.3 | 2.0 | 1.4 | 1.0 | 0.6 | 0.5 | 0.3 | 0.1 |
|  | Retirement pension | 48.8 | 51.2 | 52.7 | 52.9 | 46.2 | 36.5 | 28.7 | 21.2 | 14.2 | 8.4 | 2.5 |
|  | Disability pension | 5.2 | 4.9 | 5.1 | 5.0 | 4.8 | 3.9 | 3.2 | 2.4 | 1.3 | 0.7 | 0.2 |
|  | Sickness benefit and other health-related benefits | 3.0 | 3.6 | 5.4 | 4.6 | 4.2 | 3.2 | 2.6 | 1.6 | 1.0 | 0.4 | 0.1 |
|  | Dead | - | - | 0.8 | 2.4 | 5.2 | 7.0 | 8.5 | 9.8 | 10.9 | 11.3 | 11.6 |
|  | Censored | - | - | 0.0 | 0.0 | 8.8 | 24.9 | 39.1 | 51.9 | 64.8 | 75.0 | 84.1 |
| **nonET** |  |  |  |  |  |  |  |  |  |  |  |  |
|  | Working | 40.0 | 38.0 | 36.3 | 35.0 | 31.3 | 25.2 | 19.3 | 13.9 | 8.4 | 4.4 | 1.5 |
|  | Unemployed | 3.1 | 2.9 | 2.7 | 2.5 | 2.0 | 1.5 | 1.1 | 0.8 | 0.5 | 0.2 | 0.0 |
|  | Retirement pension | 49.8 | 52.2 | 53.4 | 53.6 | 48.0 | 38.3 | 30.2 | 22.5 | 15.6 | 9.5 | 2.9 |
|  | Disability pension | 4.7 | 4.3 | 3.9 | 3.6 | 3.1 | 2.3 | 1.5 | 1.1 | 0.6 | 0.3 | 0.1 |
|  | Sickness benefit and other health-related benefits | 2.5 | 2.5 | 2.5 | 2.3 | 2.2 | 1.7 | 1.4 | 1.0 | 0.6 | 0.3 | 0.1 |
|  | Dead | - | - | 1.1 | 2.9 | 4.7 | 6.1 | 7.3 | 8.2 | 8.8 | 9.2 | 9.3 |
|  | Censored | - | - | 0.0 | 0.1 | 8.7 | 24.8 | 39.2 | 52.4 | 65.6 | 76.1 | 86.0 |
| **PV** |  |  |  |  |  |  |  |  |  |  |  |  |
|  | Working | 29.8 | 26.9 | 22.8 | 21.7 | 19.8 | 16.7 | 12.4 | 9.0 | 6.1 | 3.3 | 0.8 |
|  | Unemployed | 4.0 | 3.9 | 3.2 | 3.4 | 2.4 | 1.5 | 1.1 | 0.5 | 0.2 | 0.1 | 0.0 |
|  | Retirement pension | 58.4 | 60.8 | 62.9 | 63.6 | 57.7 | 47.3 | 34.5 | 24.0 | 15.8 | 8.7 | 2.6 |
|  | Disability pension | 5.1 | 5.0 | 4.9 | 4.7 | 3.9 | 2.6 | 2.0 | 1.4 | 0.7 | 0.4 | 0.2 |
|  | Sickness benefit and other health-related benefits | 2.7 | 3.5 | 5.4 | 4.4 | 3.5 | 2.5 | 2.2 | 1.4 | 0.9 | 0.6 | 0.2 |
|  | Dead | - | - | 0.7 | 2.3 | 4.5 | 7.4 | 9.9 | 11.6 | 13.0 | 13.9 | 14.5 |
|  | Censored | - | - | 0.0 | 0.0 | 8.2 | 22.0 | 37.9 | 52.1 | 63.3 | 73.0 | 81.7 |
| **nonPV** |  |  |  |  |  |  |  |  |  |  |  |  |
|  | Working | 33.4 | 31.7 | 29.7 | 27.8 | 24.3 | 19.8 | 15.1 | 10.4 | 7.0 | 4.1 | 1.1 |
|  | Unemployed | 2.5 | 2.4 | 2.1 | 1.8 | 1.5 | 1.2 | 0.9 | 0.6 | 0.4 | 0.2 | 0.0 |
|  | Retirement pension | 57.1 | 59.2 | 60.6 | 61.1 | 55.7 | 46.5 | 35.3 | 25.1 | 17.0 | 9.6 | 3.0 |
|  | Disability pension | 5.0 | 4.8 | 4.5 | 4.1 | 3.5 | 2.6 | 1.9 | 1.3 | 0.8 | 0.4 | 0.2 |
|  | Sickness benefit and other health-related benefits | 2.0 | 2.0 | 1.9 | 1.9 | 1.6 | 1.3 | 1.1 | 0.7 | 0.5 | 0.3 | 0.1 |
|  | Dead | - | - | 1.2 | 3.3 | 5.3 | 7.1 | 8.4 | 9.4 | 10.1 | 10.6 | 10.8 |
|  | Censored | - | - | 0.0 | 0.1 | 8.1 | 21.5 | 37.3 | 52.5 | 64.2 | 74.9 | 84.8 |
| **MF** |  |  |  |  |  |  |  |  |  |  |  |  |
|  | Working | 26.8 | 25.6 | 21.2 | 20.2 | 18.5 | 15.8 | 13.2 | 9.4 | 5.9 | 3.5 | 1.0 |
|  | Unemployed | 1.4 | 1.0 | 0.8 | 0.6 | 0.8 | 0.6 | 0.2 | 0.3 | 0.2 | 0.1 | 0.1 |
|  | Retirement pension | 65.5 | 67.8 | 65.2 | 57.3 | 47.5 | 35.6 | 28.5 | 20.6 | 12.3 | 6.7 | 2.5 |
|  | Disability pension | 5.1 | 4.5 | 3.9 | 3.4 | 3.4 | 2.9 | 2.3 | 1.6 | 0.8 | 0.3 | 0.0 |
|  | Sickness benefit and other health-related benefits | 1.2 | 1.1 | 3.8 | 3.1 | 1.8 | 1.5 | 1.1 | 0.7 | 0.2 | 0.3 | 0.1 |
|  | Dead | - | - | 5.1 | 15.3 | 22.8 | 27.7 | 30.4 | 33.5 | 35.2 | 35.3 | 35.5 |
|  | Censored | - | - | 0.0 | 0.0 | 5.2 | 15.9 | 24.3 | 33.9 | 45.4 | 53.7 | 60.8 |
| **nonMF** |  |  |  |  |  |  |  |  |  |  |  |  |
|  | Working | 25.6 | 24.2 | 22.8 | 21.5 | 19.1 | 15.5 | 12.9 | 9.5 | 6.0 | 3.2 | 0.8 |
|  | Unemployed | 1.7 | 1.6 | 1.4 | 1.4 | 1.0 | 0.6 | 0.3 | 0.2 | 0.1 | 0.1 | 0.0 |
|  | Retirement pension | 67.5 | 69.5 | 70.2 | 69.2 | 63.6 | 52.9 | 43.4 | 32.6 | 20.4 | 11.0 | 3.6 |
|  | Disability pension | 3.7 | 3.2 | 2.8 | 2.4 | 2.0 | 1.7 | 1.2 | 0.7 | 0.4 | 0.2 | 0.1 |
|  | Sickness benefit and other health-related benefits | 1.5 | 1.6 | 1.4 | 1.3 | 1.2 | 0.9 | 0.7 | 0.4 | 0.3 | 0.1 | 0.0 |
|  | Dead | - | - | 1.4 | 4.2 | 6.7 | 8.9 | 10.8 | 12.4 | 13.6 | 14.4 | 14.6 |
|  | Censored | - | - | 0.0 | 0.0 | 6.4 | 19.4 | 30.8 | 44.1 | 59.2 | 70.9 | 80.8 |
| **MPN-U** |  |  |  |  |  |  |  |  |  |  |  |  |
|  | Working | 26.9 | 24.5 | 20.5 | 20.1 | 17.5 | 13.3 | 10.6 | 8.2 | 5.4 | 3.4 | 1.3 |
|  | Unemployed | 2.7 | 2.6 | 2.3 | 2.0 | 1.6 | 1.1 | 0.8 | 0.6 | 0.0 | 0.0 | 0.0 |
|  | Retirement pension | 62.6 | 65.3 | 64.0 | 59.6 | 49.4 | 36.9 | 27.6 | 19.6 | 12.7 | 7.3 | 1.9 |
|  | Disability pension | 5.4 | 5.0 | 4.5 | 4.1 | 3.7 | 3.0 | 2.4 | 1.7 | 1.2 | 0.8 | 0.3 |
|  | Sickness benefit and other health-related benefits | 2.4 | 2.6 | 4.8 | 3.6 | 2.3 | 2.1 | 1.8 | 1.8 | 1.6 | 0.7 | 0.0 |
|  | Dead | - | - | 3.9 | 10.6 | 18.0 | 22.4 | 25.6 | 27.7 | 29.0 | 29.6 | 30.1 |
|  | Censored | - | - | 0.0 | 0.0 | 7.5 | 21.2 | 31.3 | 40.4 | 50.1 | 58.2 | 66.4 |
| **nonMPN-U** |  |  |  |  |  |  |  |  |  |  |  |  |
|  | Working | 30.7 | 28.5 | 26.9 | 25.5 | 21.8 | 16.7 | 13.3 | 10.2 | 7.1 | 4.2 | 1.2 |
|  | Unemployed | 1.9 | 1.9 | 1.6 | 1.4 | 1.2 | 1.0 | 0.6 | 0.5 | 0.3 | 0.1 | 0.1 |
|  | Retirement pension | 61.4 | 63.8 | 64.9 | 64.6 | 59.2 | 47.5 | 37.3 | 28.4 | 19.9 | 12.2 | 3.7 |
|  | Disability pension | 3.9 | 3.7 | 3.5 | 3.1 | 2.4 | 1.9 | 1.5 | 1.0 | 0.5 | 0.3 | 0.1 |
|  | Sickness benefit and other health-related benefits | 2.1 | 2.1 | 1.9 | 1.8 | 1.7 | 1.5 | 1.3 | 0.9 | 0.6 | 0.4 | 0.1 |
|  | Dead | - | - | 1.2 | 3.6 | 5.7 | 7.3 | 8.8 | 10.0 | 10.7 | 11.2 | 11.5 |
|  | Censored | - | - | 0.0 | 0.0 | 8.0 | 24.2 | 37.3 | 49.0 | 60.9 | 71.5 | 83.3 |

*Abbreviations:* ET: essential thrombocythemia; MF: myelofibrosis; MPN-U: unclassifiable myeloproliferative neoplasm; PV: polycythemia vera

### **Figure S1.** Timeline illustrating dates for indexing, the pre-diagnosis period, and the post-diagnosis follow-up period


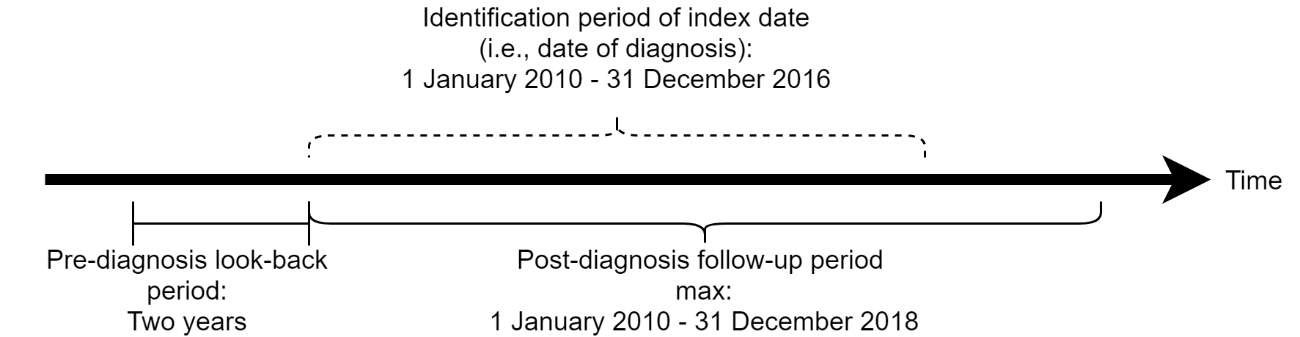


### **Figure S2.** Labor market affiliation of individuals younger than 70 years as proportions by week for each diagnosis group from two years before until two years after diagnosis


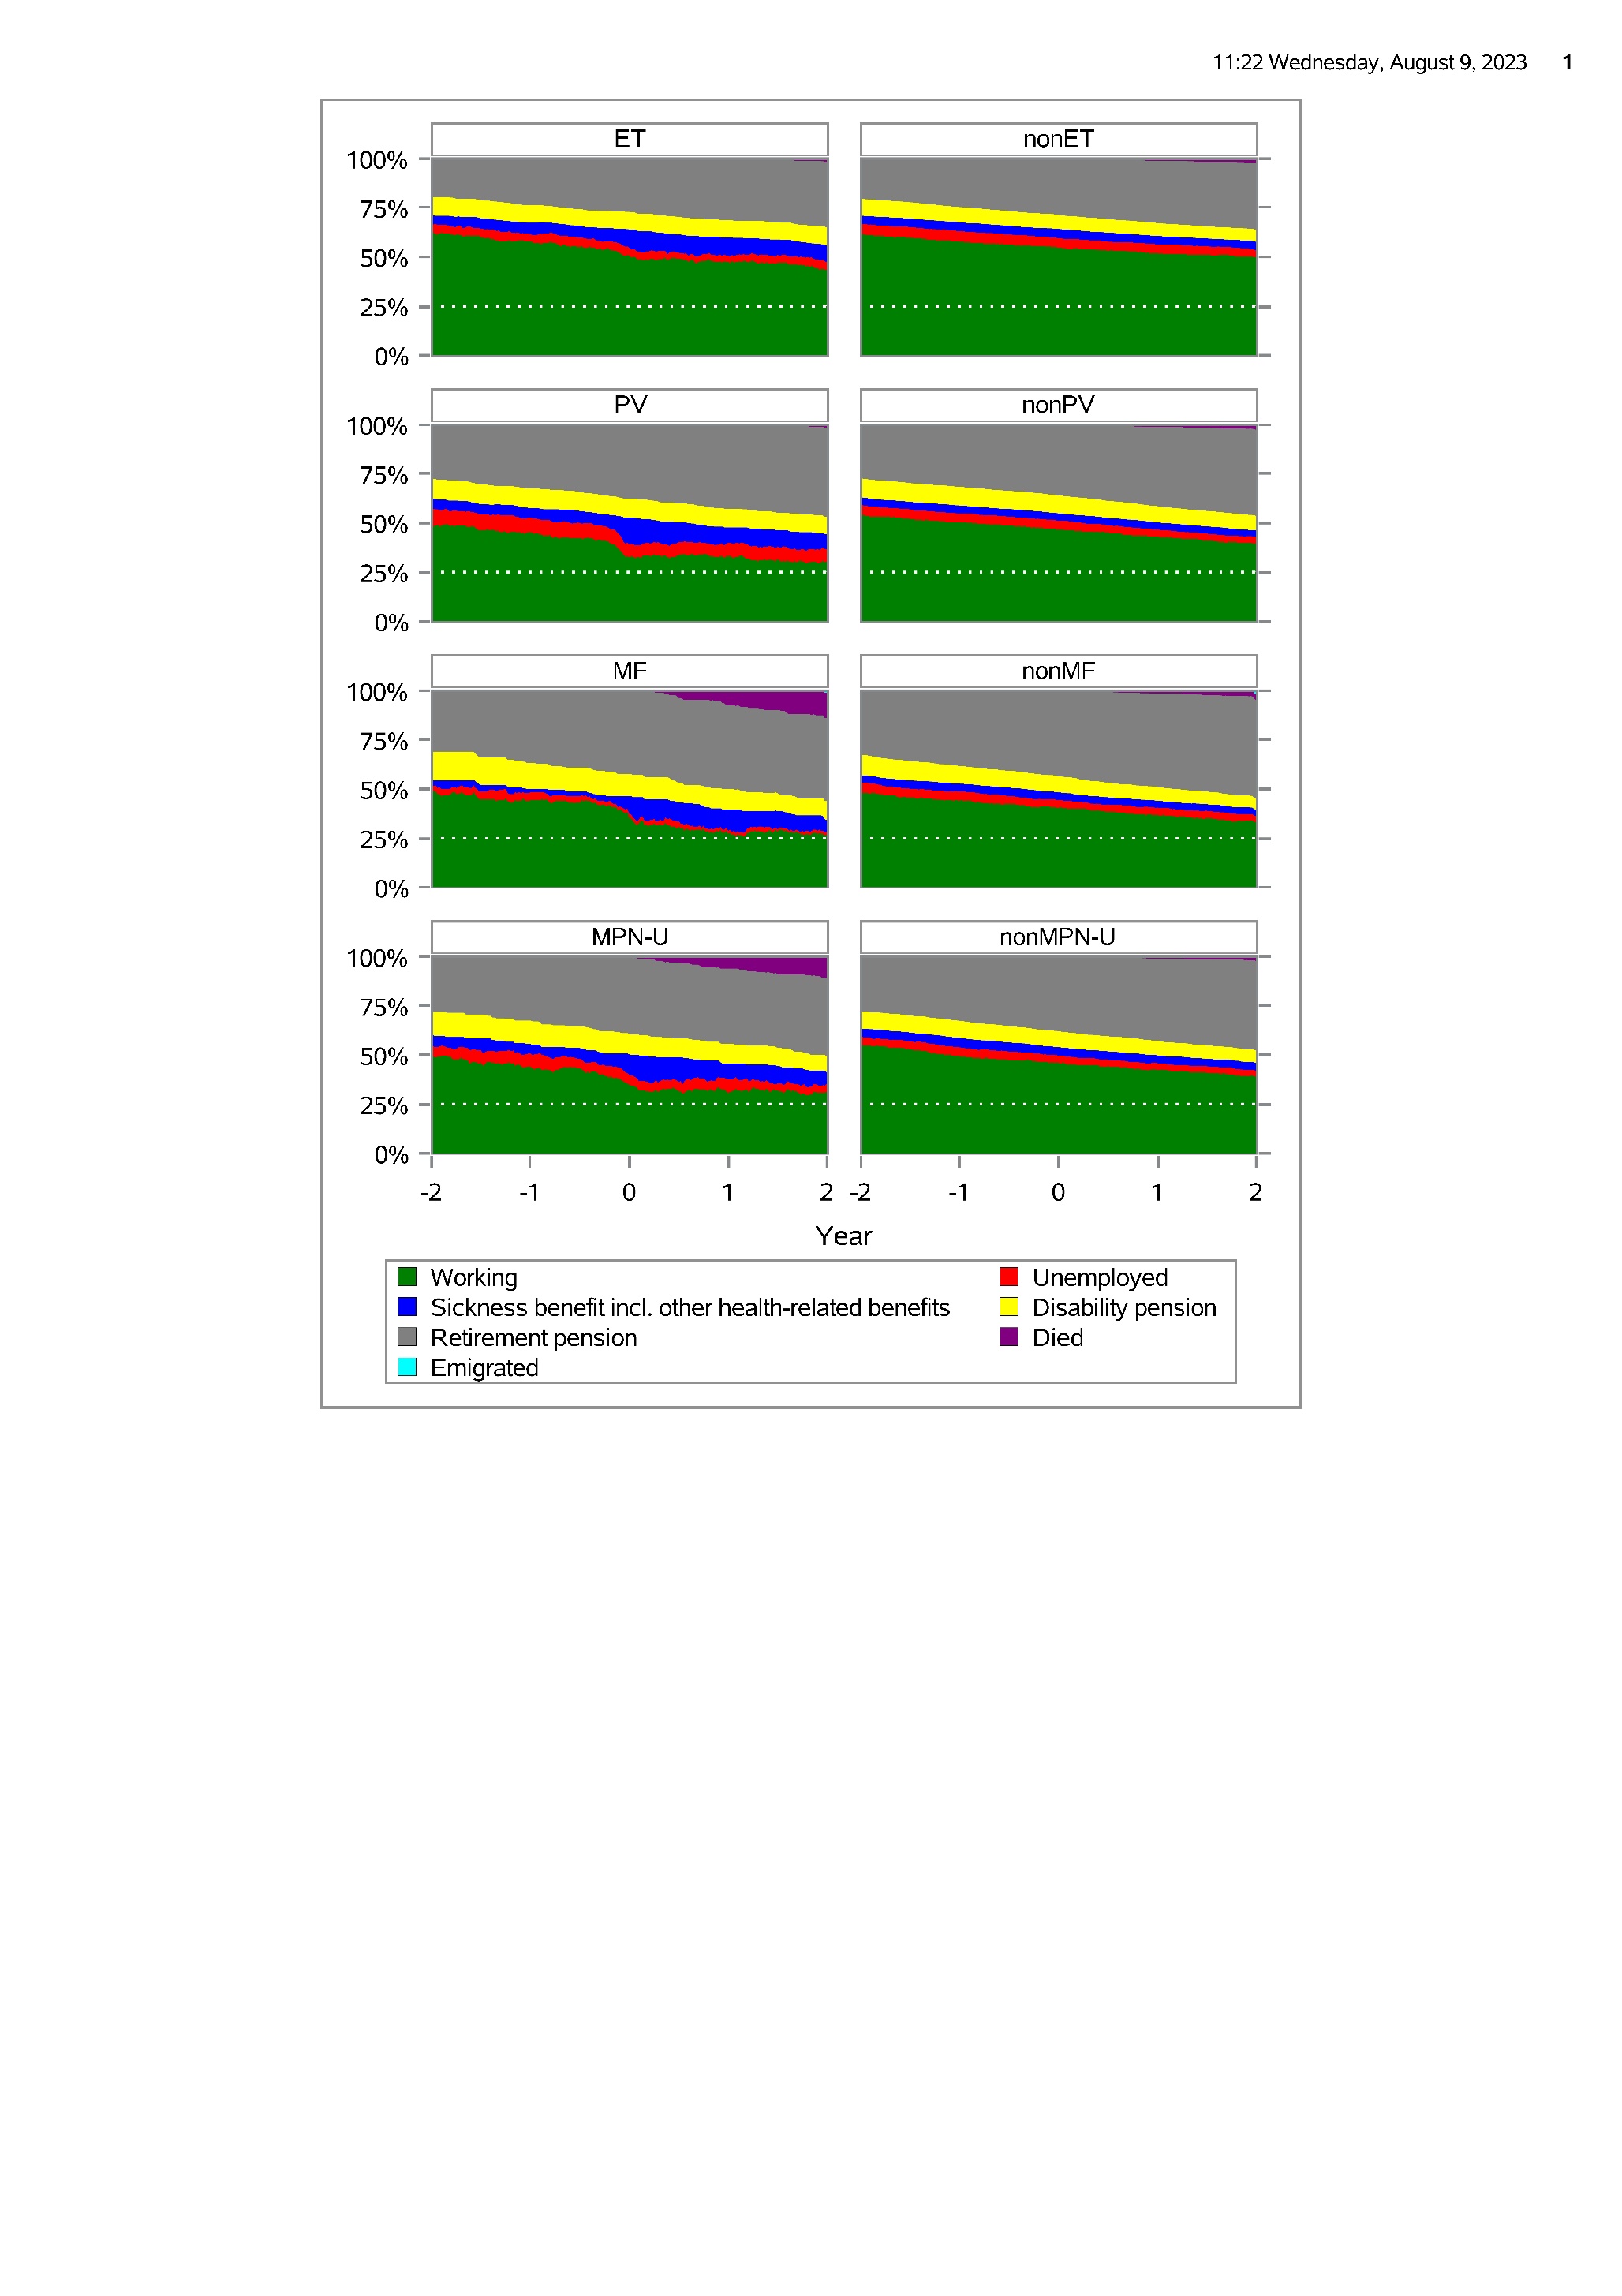
Dashed lines represent the 25% mark.

*Abbreviations:* ET: essential thrombocythemia; MF: myelofibrosis; MPN-U: unclassifiable myeloproliferative neoplasm; PV: polycythemia vera
